# Supplementary material for: Economic impacts of a glacial period: a thought experiment to assess the disconnect between econometrics and climate sciences
Source: Copernicus journal article supplement (doi:10.5194/esd-11-1073-2020), 2020-12-04
Supplement: Supplementary file 1 [file esd-11-1073-2020-supplement.zip]

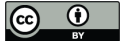

## *Supplement of*

# **Economic impacts of a glacial period: a thought experiment to assess the disconnect between econometrics and climate sciences**

**Marie-Noëlle Woillez et al.**

*Correspondence to:* Marie-Noëlle Woillez (woillezm@afd.fr)

- esd-11-1073-2020-supplement-title-page.pdf
- Pour\_ESD
  - ComputeMainProjections\_LGM05\_BaseCase\_BHM.R
  - ComputeMainProjections\_LGM05\_BaseCase\_Newell2018.R
  - GetTemperatureChange\_LGM05.R
  - Readme.pdf
  - input
    - \* CountryTempChange\_LGM05.csv
    - \* sat\_LGM\_annan2013.nc

The copyright of individual parts of the supplement might differ from the CC BY 4.0 License.
